# Supplementary material
Source: Springer Nature journal article supplement (https://www.springermedizin.de/resource/supplementary/12865_2009_301_MOESM10_ESM.pdf/9427706)

**A** Head kidney leukocytes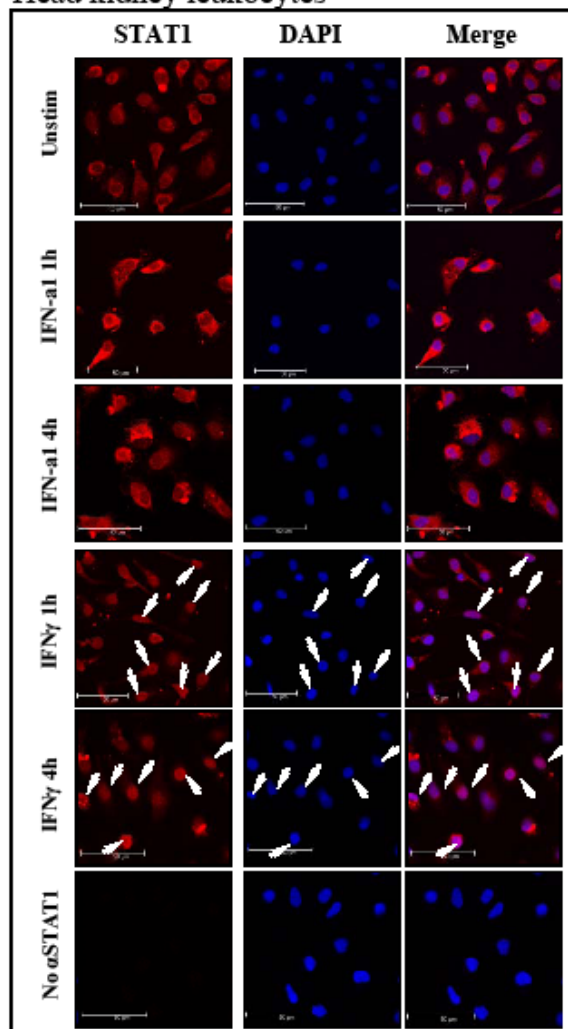**B** TO cells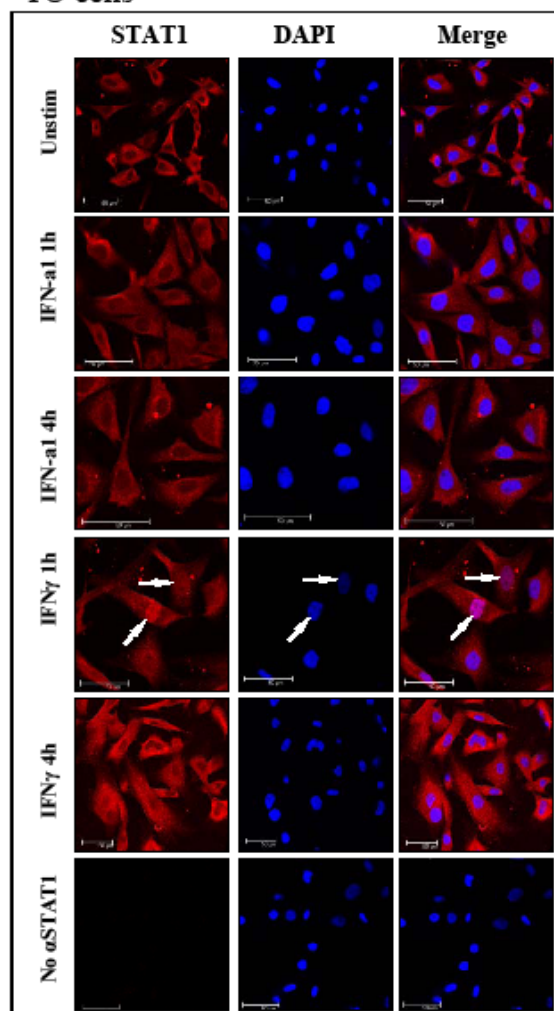**C** CHSE-214 cells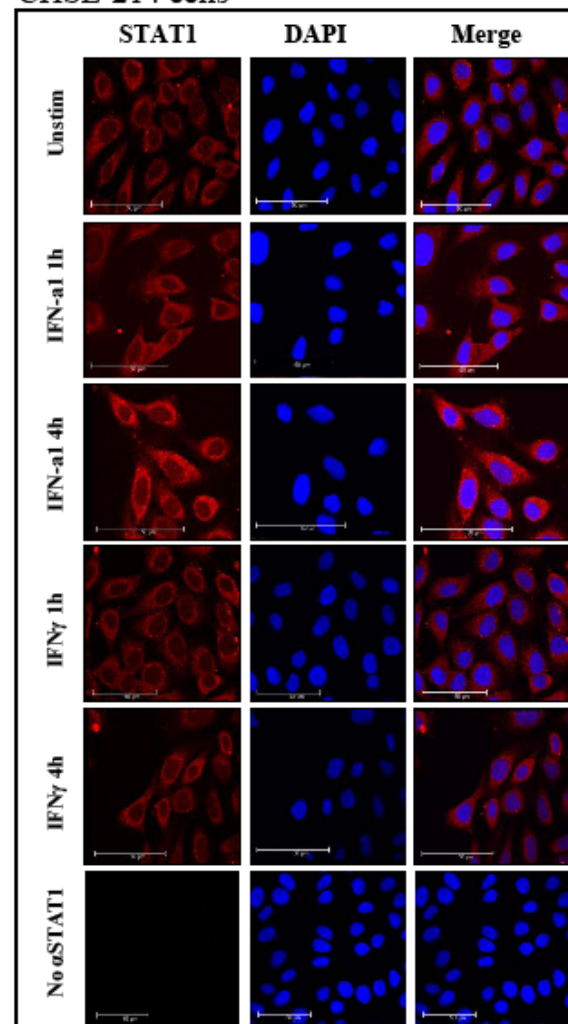

Supplement: MOESM10 [file 9427706]
